# Supplementary material for: TD-DFT Monitoring of the Absorption Spectra of Polycyclic Aromatic Hydrocarbons over the Basque Country, Spain
Source: MDPI journal article supplement (doi:10.3390/suschem2040033), 2021-10-29
Supplement: s1 [file s1]

Supplementary Materials for

TD-DFT Monitoring of the Absorption  
Spectra of Polycyclic Aromatic  
Hydrocarbons over the Basque Country,  
Spain

*Patricia González-Berdullas<sup>1</sup> and Luís Pinto da Silva<sup>1,2,\*</sup>*

<sup>1</sup> Chemistry Research Unit (CIQUP), Faculty of Sciences of University of Porto (FCUP), R. Campo Alegre 697, 4169-007 Porto, Portugal.

<sup>2</sup> LACOMEPhi, GreenUPorto, Department of Geosciences, Environment and Territorial Planning, Faculty of Sciences of University of Porto, R. Campo Alegre 697, 4169-007 Porto, Portugal.

## Index

### Figures

|                                                                        |           |
|------------------------------------------------------------------------|-----------|
| <b>Figure S1</b> – Chemical structures of the studied PAHs .....       | <b>S4</b> |
| <b>Figure S2</b> – Map showing the location of the sampling sites..... | <b>S5</b> |

### Cartesian Coordinates

|                                       |            |
|---------------------------------------|------------|
| Anthracene.....                       | <b>S6</b>  |
| Benzo[ <i>a</i> ]anthracene .....     | <b>S7</b>  |
| Benzo[ <i>a</i> ]pyrene .....         | <b>S8</b>  |
| Benzo[ <i>b</i> ]fluoranthene.....    | <b>S9</b>  |
| Benzo[ <i>k</i> ]fluoranthene.....    | <b>S10</b> |
| Benzo[ <i>g,h,i</i> ]perylene .....   | <b>S11</b> |
| Chrysene .....                        | <b>S12</b> |
| Dibenzo[ <i>a,h</i> ]anthracene ..... | <b>S13</b> |
| Fluorene .....                        | <b>S14</b> |
| Fluoranthene .....                    | <b>S15</b> |
| Indeno[1,2,3- <i>cd</i> ]pyrene ..... | <b>S16</b> |
| Naphthalene .....                     | <b>S17</b> |
| Phenanthrene .....                    | <b>S18</b> |
| Pyrene.....                           | <b>S19</b> |

### Tables

|                                                                                                                                                                                                                              |            |
|------------------------------------------------------------------------------------------------------------------------------------------------------------------------------------------------------------------------------|------------|
| <b>Table S1</b> –Experimental mean concentration of PAHs over Azpeitia, Urretxu, and Bilbao.....                                                                                                                             | <b>S20</b> |
| <b>Table S2</b> – Relative contribution (in %) of individual PAHs to the absorption intensity at ~380 nm, over Azpeitia, Urretxu, and Bilbao using BP86/6-31+G(d,p). Only the most relevant contributions are presented..... | <b>S20</b> |
| <b>Table S3</b> – Relative contribution (in %) of individual PAHs to the absorption intensity at ~425 nm, over Azpeitia, Urretxu, and Bilbao using BP86/6-31+G(d,p). Only the most relevant contributions are presented..... | <b>S21</b> |

|                                                                                                                                                                                                                                                 |            |
|-------------------------------------------------------------------------------------------------------------------------------------------------------------------------------------------------------------------------------------------------|------------|
| <b>Table S4</b> – Relative contribution (in %) of individual PAHs to the absorption intensity at ~345 nm, over Azpeitia, Urretxu, and Bilbao using PBE0/6-31G(d,p). Only the most relevant contributions are presented.....                     | <b>S21</b> |
| <b>Table S5</b> – Relative contribution (in %) of individual PAHs to the absorption intensity at ~400 nm, over Azpeitia, Urretxu, and Bilbao using PBE0/6-31G(d,p). Only the most relevant contributions are presented.....                     | <b>S21</b> |
| <b>Table S6</b> – Relative contribution (in %) of individual PAHs to the absorption intensity at ~360 nm, over Azpeitia, Urretxu, and Bilbao using B3LYP/6-31+G(d,p). Only the most relevant contributions are presented. ....                  | <b>S22</b> |
| <b>Table S7</b> – Relative contribution (in %) of individual PAHs to the absorption intensity at ~410 nm, over Azpeitia, Urretxu, and Bilbao using B3LYP/6-31+G(d,p). Only the most relevant contributions are presented. ....                  | <b>S22</b> |
| <b>Table S8</b> – Relative contribution (in %) of individual PAHs to the absorption intensity at ~325 nm, over Azpeitia, Urretxu, and Bilbao using wB97XD/6-31+G(d,p). Only the most relevant contributions are presented. ....                 | <b>S22</b> |
| <b>Table S9</b> – Relative contribution (in %) of individual PAHs to the absorption intensity at ~365 nm, over Azpeitia and Urretxu, and ~382 nm over Bilbao using wB97XD/6-31+G(d,p). Only the most relevant contributions are presented. .... | <b>S23</b> |
| <b>Table S10</b> – Scope of the selected datasets.....                                                                                                                                                                                          | <b>S23</b> |
| <b>Table S11</b> – Summary of the experimental datasets in which this is study was based. Results are presented in ng/m <sup>3</sup> .....                                                                                                      | <b>S24</b> |
| <b>References</b> .....                                                                                                                                                                                                                         | <b>S25</b> |

## Figures

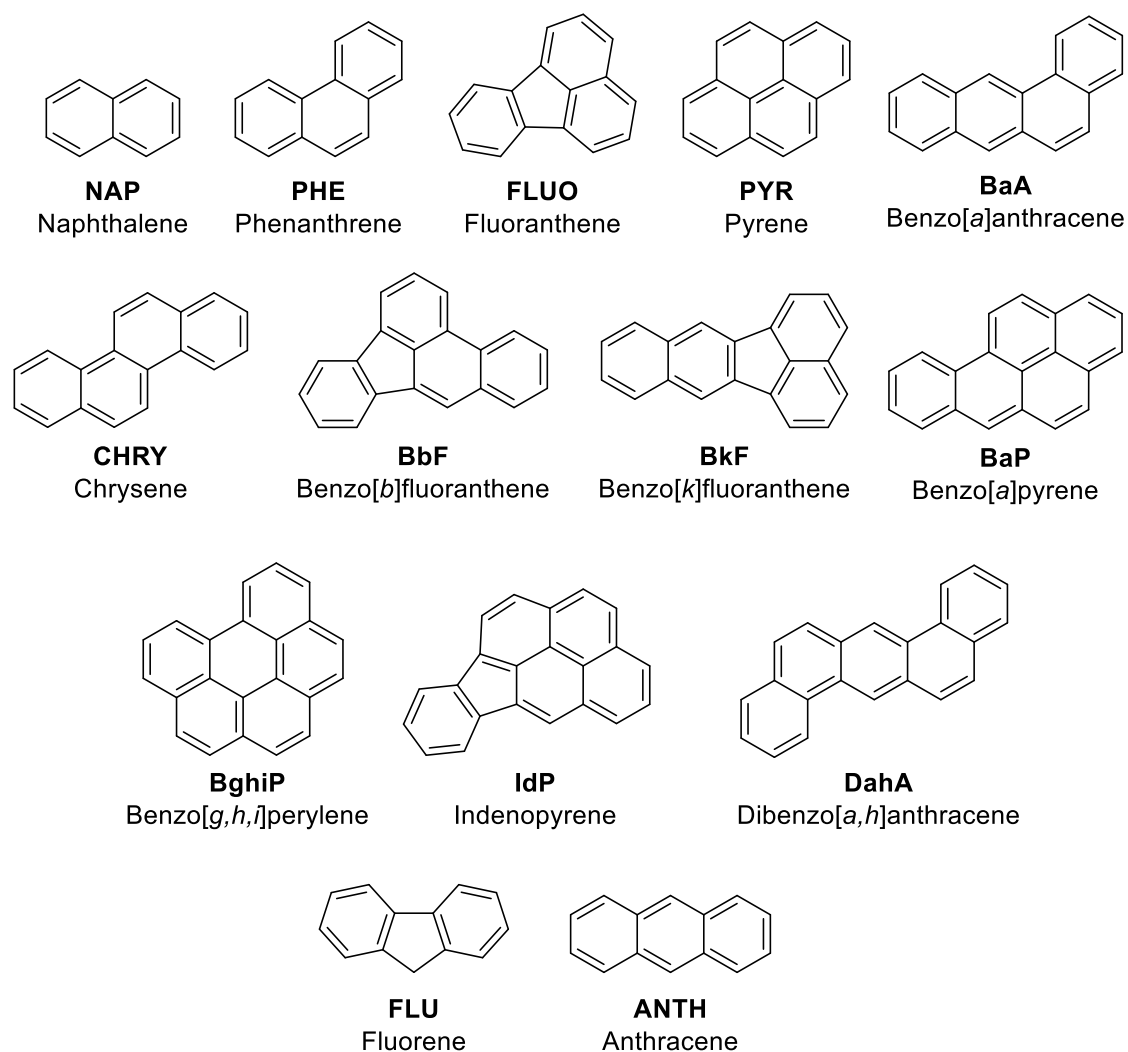

**Figure S1.** Chemical structures of the studied PAHs.

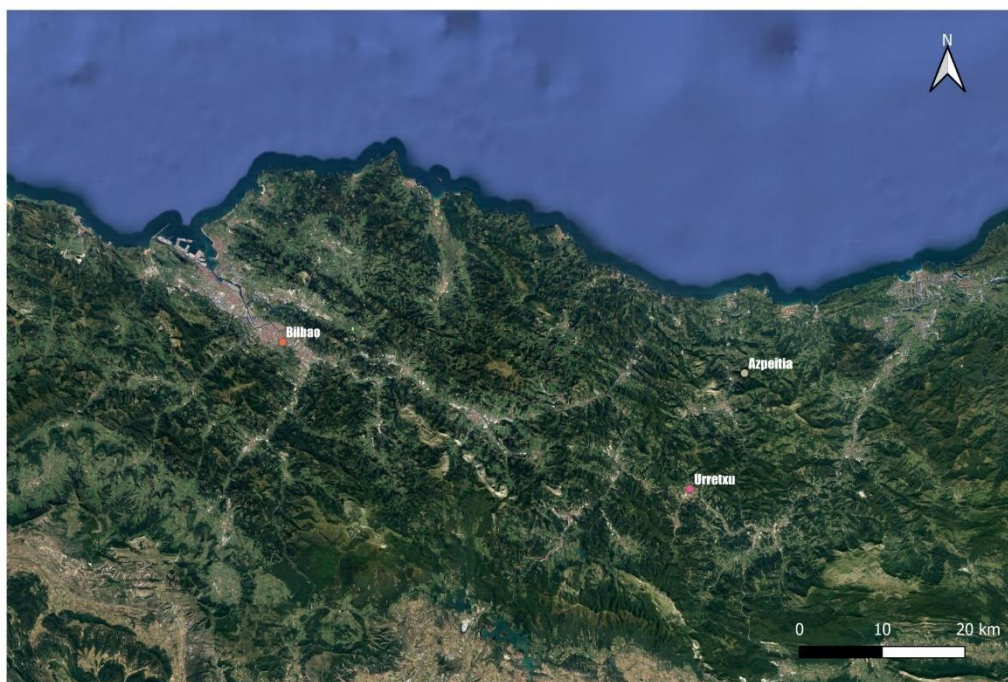

**Figure S2.** Map showing the location of the sampling sites.

### Cartesian Coordinates:

ANTH (anthracene).

|   |          |         |    |
|---|----------|---------|----|
| C | -2.21706 | 4.54539 | 0. |
| C | -3.46129 | 3.913   | 0. |
| C | -3.53424 | 2.52357 | 0. |
| C | -2.36307 | 1.76435 | 0. |
| C | -1.10325 | 2.38586 | 0. |
| C | -1.02924 | 3.79538 | 0. |
| C | 0.23026  | 4.41765 | 0. |
| C | 1.41768  | 3.6669  | 0. |
| C | 1.34367  | 2.25738 | 0. |
| C | 0.08416  | 1.63511 | 0. |
| C | 2.67751  | 4.2884  | 0. |
| C | 3.84867  | 3.52918 | 0. |
| C | 3.77572  | 2.13975 | 0. |
| C | 2.53148  | 1.50736 | 0. |
| H | -2.1806  | 5.63248 | 0. |
| H | -4.37191 | 4.50622 | 0. |
| H | -4.50198 | 2.02897 | 0. |
| H | -2.44065 | 0.67943 | 0. |
| H | 0.28733  | 5.50449 | 0. |
| H | 0.0271   | 0.54827 | 0. |
| H | 2.75509  | 5.37332 | 0. |
| H | 4.81641  | 4.02378 | 0. |
| H | 4.68634  | 1.54652 | 0. |
| H | 2.49502  | 0.42028 | 0. |

### Cartesian Coordinates:

**BaA** (benzo[*a*]anthracene).

|   |          |          |          |
|---|----------|----------|----------|
| C | -0.94337 | 3.44904  | 0.00172  |
| C | -2.19643 | 2.85652  | -0.01824 |
| C | -2.29824 | 1.4686   | -0.00998 |
| C | -1.15133 | 0.65719  | 0.02124  |
| C | 0.14493  | 1.2346   | 0.04488  |
| C | 0.20561  | 2.65173  | 0.03184  |
| C | 1.29961  | 0.37021  | 0.08489  |
| C | 1.10908  | -1.03311 | 0.10231  |
| C | -0.18291 | -1.56395 | 0.07175  |
| C | -1.29676 | -0.73133 | 0.03157  |
| C | 2.64349  | 0.8277   | 0.11313  |
| C | 2.20869  | -1.90664 | 0.15408  |
| C | 3.52576  | -1.43148 | 0.19104  |
| C | 3.74938  | -0.04379 | 0.16692  |
| C | 5.07083  | 0.43569  | 0.2008   |
| C | 6.15166  | -0.44617 | 0.26282  |
| C | 5.92685  | -1.81854 | 0.2906   |
| C | 4.62147  | -2.3091  | 0.25344  |
| H | -0.85251 | 4.53208  | -0.00458 |
| H | -3.09319 | 3.46953  | -0.03963 |
| H | -3.28955 | 1.01985  | -0.02572 |
| H | 1.16105  | 3.168    | 0.04778  |
| H | -0.33943 | -2.64063 | 0.08174  |
| H | -2.28545 | -1.18494 | 0.01142  |
| H | 2.84909  | 1.89461  | 0.09699  |
| H | 2.03623  | -2.98163 | 0.17001  |
| H | 5.26784  | 1.50519  | 0.18105  |
| H | 7.16731  | -0.06036 | 0.29071  |
| H | 6.7652   | -2.50823 | 0.34137  |
| H | 4.46343  | -3.385   | 0.27594  |

### Cartesian Coordinates:

**BaP** (benzo[*a*]pyrene).

|   |          |          |          |
|---|----------|----------|----------|
| C | -0.6557  | 2.71807  | 1.12935  |
| C | -1.88415 | 2.30101  | 0.60635  |
| C | -2.04961 | 1.05128  | -0.03578 |
| C | -0.89831 | 0.22418  | -0.129   |
| C | 0.35363  | 0.64534  | 0.40216  |
| C | 0.47105  | 1.90143  | 1.03468  |
| C | 1.70943  | 2.30786  | 1.55521  |
| C | 2.82716  | 1.4824   | 1.45395  |
| C | 2.71988  | 0.24113  | 0.83118  |
| C | 1.49399  | -0.1889  | 0.30264  |
| C | -0.98058 | -1.03829 | -0.75534 |
| C | 0.15686  | -1.85185 | -0.84572 |
| C | 1.37953  | -1.43306 | -0.3234  |
| C | -3.29883 | 0.59064  | -0.58512 |
| C | -3.3506  | -0.68078 | -1.20772 |
| C | -2.19951 | -1.47066 | -1.28317 |
| C | -4.51092 | 1.32813  | -0.55082 |
| C | -5.7008  | 0.83805  | -1.09865 |
| C | -5.7212  | -0.40946 | -1.70154 |
| C | -4.55243 | -1.16293 | -1.7549  |
| H | -0.59411 | 3.69114  | 1.61163  |
| H | -2.71941 | 2.98698  | 0.71513  |
| H | 1.81177  | 3.27375  | 2.04478  |
| H | 3.78175  | 1.80615  | 1.86019  |
| H | 3.60271  | -0.39044 | 0.76097  |
| H | 0.10167  | -2.8261  | -1.32688 |
| H | 2.24163  | -2.09016 | -0.41129 |
| H | -2.25304 | -2.44602 | -1.76442 |
| H | -4.55188 | 2.31116  | -0.09075 |
| H | -6.60732 | 1.43569  | -1.05093 |
| H | -6.64122 | -0.79765 | -2.12956 |
| H | -4.58671 | -2.14045 | -2.23212 |



### Cartesian Coordinates:

**BbF** (benzo[*b*]fluoranthene).

|   |          |          |    |
|---|----------|----------|----|
| C | 0.06069  | 4.2435   | 0. |
| C | -1.02196 | 3.36479  | 0. |
| C | -0.82769 | 1.97495  | 0. |
| C | 0.50531  | 1.44679  | 0. |
| C | 1.57628  | 2.36589  | 0. |
| C | 1.35718  | 3.74535  | 0. |
| C | -1.94753 | 1.11672  | 0. |
| C | -1.75204 | -0.2506  | 0. |
| C | -0.46093 | -0.75256 | 0. |
| C | 0.69829  | 0.02427  | 0. |
| C | -2.67865 | -1.3747  | 0. |
| C | -1.89377 | -2.55921 | 0. |
| C | -0.49784 | -2.14363 | 0. |
| C | 0.68498  | -2.85751 | 0. |
| C | 1.88974  | -2.14175 | 0. |
| C | 1.90234  | -0.72885 | 0. |
| C | -4.05989 | -1.433   | 0. |
| C | -4.65995 | -2.69633 | 0. |
| C | -3.88184 | -3.87004 | 0. |
| C | -2.48475 | -3.80893 | 0. |
| H | -0.1107  | 5.31675  | 0. |
| H | -2.02789 | 3.77988  | 0. |
| H | 2.60513  | 2.01613  | 0. |
| H | 2.20278  | 4.42834  | 0. |
| H | -2.95585 | 1.5194   | 0. |
| H | 0.68897  | -3.94198 | 0. |
| H | 2.83397  | -2.68231 | 0. |
| H | 2.86481  | -0.22447 | 0. |
| H | -4.66475 | -0.53343 | 0. |
| H | -5.74497 | -2.77539 | 0. |
| H | -4.37683 | -4.83879 | 0. |
| H | -1.8909  | -4.71583 | 0. |

### Cartesian Coordinates:

**BkF** (benzo[k]fluoranthene).

|   |          |          |    |
|---|----------|----------|----|
| C | -1.44367 | 5.43667  | 0. |
| C | -0.05387 | 5.51011  | 0. |
| C | 0.70788  | 4.34098  | 0. |
| C | 0.09079  | 3.08143  | 0. |
| C | -1.33559 | 3.00396  | 0. |
| C | -2.07994 | 4.19356  | 0. |
| C | -1.97909 | 1.75207  | 0. |
| C | -1.2011  | 0.60909  | 0. |
| C | 0.21676  | 0.68947  | 0. |
| C | 0.86574  | 1.90946  | 0. |
| C | -1.54854 | -0.80686 | 0. |
| C | -0.36538 | -1.53233 | 0. |
| C | 0.72481  | -0.67508 | 0. |
| C | -2.75278 | -1.4869  | 0. |
| C | -2.72833 | -2.89426 | 0. |
| C | -1.51088 | -3.61059 | 0. |
| C | -0.282   | -2.92263 | 0. |
| C | 1.02033  | -3.4603  | 0. |
| C | 2.14464  | -2.60554 | 0. |
| C | 2.00153  | -1.20638 | 0. |
| H | -2.03516 | 6.34864  | 0. |
| H | 0.44007  | 6.47838  | 0. |
| H | 1.79269  | 4.42266  | 0. |
| H | -3.16732 | 4.1627   | 0. |
| H | -3.06155 | 1.67887  | 0. |
| H | 1.94964  | 1.95351  | 0. |
| H | -3.69869 | -0.95608 | 0. |
| H | -3.66734 | -3.44421 | 0. |
| H | -1.52826 | -4.69741 | 0. |
| H | 1.16683  | -4.53728 | 0. |
| H | 3.14257  | -3.03922 | 0. |
| H | 2.8767   | -0.56563 | 0. |

### Cartesian Coordinates:

**BzP** (benzo[*g,h,i*]perylene).

|   |          |          |          |
|---|----------|----------|----------|
| C | -0.42979 | 6.94421  | -0.65787 |
| C | -1.73097 | 6.48992  | -0.30973 |
| C | -1.98173 | 5.12183  | -0.17874 |
| C | -0.96456 | 4.2025   | -0.38775 |
| C | 0.30861  | 4.64507  | -0.74805 |
| C | 0.619    | 6.01895  | -0.90327 |
| C | -2.76071 | 7.41283  | -0.09467 |
| C | -2.52132 | 8.78083  | -0.19745 |
| C | -1.24519 | 9.25557  | -0.51285 |
| C | -0.19373 | 8.33588  | -0.75314 |
| C | 1.91575  | 6.50682  | -1.28402 |
| C | 2.14202  | 7.90622  | -1.35457 |
| C | 1.09238  | 8.81626  | -1.08314 |
| C | -0.9976  | 10.63005 | -0.59031 |
| C | 0.27625  | 11.10402 | -0.89659 |
| C | 1.32473  | 10.2123  | -1.14805 |
| C | 3.42159  | 8.41822  | -1.70278 |
| C | 3.63582  | 9.80018  | -1.74463 |
| C | 2.59956  | 10.68843 | -1.46699 |
| C | 4.46546  | 7.54076  | -2.00766 |
| C | 4.25897  | 6.17004  | -1.96913 |
| C | 3.00933  | 5.66529  | -1.60813 |
| H | -2.97022 | 4.76091  | 0.0957   |
| H | -1.15784 | 3.13936  | -0.27163 |
| H | 1.066    | 3.8805   | -0.89537 |
| H | -3.76289 | 7.07458  | 0.15957  |
| H | -3.3424  | 9.47236  | -0.02206 |
| H | -1.79456 | 11.34752 | -0.40748 |
| H | 0.43964  | 12.17827 | -0.943   |
| H | 4.61471  | 10.20129 | -1.99834 |
| H | 2.79789  | 11.75686 | -1.51004 |
| H | 5.44648  | 7.91857  | -2.2861  |
| H | 5.06825  | 5.48923  | -2.21985 |
| H | 2.90528  | 4.58429  | -1.5984  |

**Cartesian Coordinates:**

**CHR** (chrysene).

|   |          |          |          |
|---|----------|----------|----------|
| C | -1.99357 | 2.52431  | -0.0179  |
| C | -3.22791 | 1.86583  | -0.02941 |
| C | -3.2716  | 0.48142  | -0.0241  |
| C | -2.08158 | -0.23882 | -0.00392 |
| C | -0.83718 | 0.41568  | 0.01403  |
| C | -0.75491 | 1.82807  | 0.00376  |
| C | 0.54561  | 2.46116  | 0.02111  |
| C | 1.73496  | 1.67723  | 0.07722  |
| C | 1.57913  | 0.27563  | 0.08085  |
| C | 0.32941  | -0.34102 | 0.04484  |
| C | 0.70302  | 3.86217  | -0.01658 |
| C | 1.95353  | 4.4782   | 0.00675  |
| C | 3.1185   | 3.72202  | 0.08328  |
| C | 3.03443  | 2.31042  | 0.12594  |
| C | 4.36292  | 4.37588  | 0.12038  |
| C | 5.55002  | 3.65622  | 0.21209  |
| C | 5.50358  | 2.273    | 0.26674  |
| C | 4.26992  | 1.61488  | 0.22202  |
| H | -2.02338 | 3.60984  | -0.01882 |
| H | -4.14977 | 2.44138  | -0.04084 |
| H | -4.22554 | -0.0382  | -0.03306 |
| H | -2.13202 | -1.32585 | 0.00175  |
| H | 2.44078  | -0.38492 | 0.1062   |
| H | 0.28595  | -1.42817 | 0.04694  |
| H | -0.15753 | 4.52239  | -0.07161 |
| H | 1.99859  | 5.56471  | -0.02941 |
| H | 4.41546  | 5.46213  | 0.08142  |
| H | 6.50367  | 4.17545  | 0.2441   |
| H | 6.42253  | 1.6981   | 0.34564  |
| H | 4.29709  | 0.53051  | 0.27341  |

**Cartesian Coordinates:****DahA** (dibenzo[*a,h*]anthracene).

|   |          |          |          |
|---|----------|----------|----------|
| C | 0.232    | 7.10594  | 0.31711  |
| C | -1.0548  | 6.50923  | 0.3871   |
| C | -1.09268 | 5.09368  | 0.28923  |
| C | 0.06622  | 4.32116  | 0.1339   |
| C | 1.30729  | 4.93617  | 0.06817  |
| C | 1.38728  | 6.32144  | 0.15846  |
| C | -2.21716 | 7.35894  | 0.55319  |
| C | -2.03833 | 8.75454  | 0.65096  |
| C | -0.75451 | 9.30174  | 0.57468  |
| C | 0.36295  | 8.49093  | 0.40817  |
| C | -3.55925 | 6.90372  | 0.62913  |
| C | -4.66722 | 7.76828  | 0.80059  |
| C | -4.47759 | 9.1618   | 0.91217  |
| C | -3.141   | 9.61443  | 0.82718  |
| C | -5.96533 | 7.24683  | 0.86241  |
| C | -7.07022 | 8.07958  | 1.03733  |
| C | -6.91518 | 9.46207  | 1.16083  |
| C | -5.61803 | 10.0304  | 1.10115  |
| C | -8.04824 | 10.27644 | 1.34492  |
| C | -7.93015 | 11.65747 | 1.47636  |
| C | -6.67454 | 12.24135 | 1.42342  |
| C | -5.54133 | 11.44169 | 1.23833  |
| H | -6.56908 | 13.31838 | 1.52627  |
| H | -4.58326 | 11.95253 | 1.20647  |
| H | -8.81503 | 12.27172 | 1.62023  |
| H | -9.04209 | 9.83499  | 1.38965  |
| H | -8.0608  | 7.63081  | 1.07911  |
| H | -6.13484 | 6.17579  | 0.77426  |
| H | -3.76054 | 5.83765  | 0.55282  |
| H | -2.93664 | 10.67939 | 0.89961  |
| H | -0.60667 | 10.37718 | 0.64482  |
| H | 1.34303  | 8.96012  | 0.35366  |
| H | 2.36837  | 6.79015  | 0.10589  |
| H | 2.21093  | 4.34438  | -0.05164 |
| H | -0.00516 | 3.23856  | 0.06563  |
| H | -2.03771 | 4.55986  | 0.33629  |

### Cartesian Coordinates:

FLU (fluorene).

|   |          |         |          |
|---|----------|---------|----------|
| C | -0.10355 | 5.70967 | -0.00793 |
| C | -1.2921  | 4.76983 | -0.00494 |
| C | -0.85448 | 3.4272  | -0.00165 |
| C | 0.59339  | 3.41014 | -0.00176 |
| C | 1.06252  | 4.74208 | -0.00513 |
| C | -2.63882 | 5.09313 | -0.00494 |
| C | -3.56321 | 4.0467  | -0.00159 |
| C | -3.1346  | 2.70812 | 0.00152  |
| C | -1.77232 | 2.39043 | 0.00149  |
| C | 2.41648  | 5.03356 | -0.00536 |
| C | 3.31596  | 3.96565 | -0.00213 |
| C | 2.85593  | 2.63754 | 0.00108  |
| C | 1.48655  | 2.35204 | 0.00126  |
| H | -0.0962  | 6.32685 | 0.89516  |
| H | -0.09642 | 6.32127 | -0.91483 |
| H | -2.96996 | 6.1261  | -0.00729 |
| H | -4.62803 | 4.26803 | -0.00132 |
| H | -3.87265 | 1.90938 | 0.00411  |
| H | -1.45189 | 1.35439 | 0.00403  |
| H | 2.77187  | 6.05844 | -0.00779 |
| H | 4.3857   | 4.16182 | -0.00204 |
| H | 3.57496  | 1.82163 | 0.00358  |
| H | 1.1418   | 1.32383 | 0.00388  |

### Cartesian Coordinates:

FLUO (fluoranthene).

|   |          |          |          |
|---|----------|----------|----------|
| C | -0.71519 | 4.15134  | 0.08114  |
| C | -1.85666 | 3.34713  | 0.00205  |
| C | -1.75329 | 1.94768  | -0.12091 |
| C | 0.62182  | 2.11324  | -0.09937 |
| C | 0.51713  | 3.52723  | 0.03454  |
| C | -0.50578 | 1.31753  | -0.17469 |
| C | 1.87455  | 4.05114  | 0.10651  |
| C | 2.74877  | 2.97756  | 0.01095  |
| C | 2.0423   | 1.79014  | -0.11952 |
| C | 2.38827  | 5.32706  | 0.25074  |
| C | 3.78538  | 5.48583  | 0.29646  |
| C | 4.65629  | 4.37844  | 0.19499  |
| C | 4.13728  | 3.07729  | 0.04521  |
| C | 2.7395   | 0.60145  | -0.23644 |
| C | 4.14558  | 0.64401  | -0.21339 |
| C | 4.84344  | 1.86391  | -0.07206 |
| H | -0.80109 | 5.22755  | 0.17817  |
| H | -2.84136 | 3.80815  | 0.03888  |
| H | -2.65979 | 1.3485   | -0.17365 |
| H | -0.43282 | 0.24     | -0.26771 |
| H | 1.73546  | 6.18953  | 0.33123  |
| H | 4.20515  | 6.48282  | 0.41408  |
| H | 5.73079  | 4.53665  | 0.23537  |
| H | 2.22136  | -0.34531 | -0.34457 |
| H | 4.70872  | -0.28253 | -0.30528 |
| H | 5.93013  | 1.86046  | -0.05482 |

### Cartesian Coordinates:

**IdP** (indeno[1,2,3-*cd*]pyrene).

|   |          |          |    |
|---|----------|----------|----|
| C | -2.92899 | 3.44313  | 0. |
| C | -4.22888 | 2.88761  | 0. |
| C | -4.36319 | 1.51003  | 0. |
| C | -3.22128 | 0.72928  | 0. |
| C | -1.92976 | 1.23413  | 0. |
| C | -1.76229 | 2.62635  | 0. |
| C | -0.44259 | 3.10316  | 0. |
| C | 0.64227  | 2.20774  | 0. |
| C | 0.44255  | 0.80997  | 0. |
| C | -0.87304 | 0.31049  | 0. |
| C | -3.53564 | -0.61852 | 0. |
| C | -2.50312 | -1.54536 | 0. |
| C | -1.15577 | -1.08928 | 0. |
| C | -0.06694 | -1.97173 | 0. |
| C | 1.24603  | -1.48736 | 0. |
| C | 1.49937  | -0.11164 | 0. |
| C | -5.5061  | 0.608    | 0. |
| C | -4.99027 | -0.72337 | 0. |
| C | -6.86645 | 0.85004  | 0. |
| C | -7.72339 | -0.25452 | 0. |
| C | -7.21606 | -1.56914 | 0. |
| C | -5.83821 | -1.81436 | 0. |
| H | -2.82386 | 4.52647  | 0. |
| H | -5.09924 | 3.53516  | 0. |
| H | -0.24748 | 4.17279  | 0. |
| H | 1.65265  | 2.61179  | 0. |
| H | -2.72433 | -2.6082  | 0. |
| H | -0.23068 | -3.047   | 0. |
| H | 2.07848  | -2.18718 | 0. |
| H | 2.53003  | 0.23575  | 0. |
| H | -7.26168 | 1.85943  | 0. |
| H | -8.8     | -0.09757 | 0. |
| H | -7.91027 | -2.40693 | 0. |
| H | -5.45669 | -2.82897 | 0. |



### Cartesian Coordinates:

NAP (naphthalene).

|   |          |          |          |
|---|----------|----------|----------|
| C | -6.29569 | 2.50665  | 0.2303   |
| C | -7.28722 | 1.53441  | 0.0884   |
| C | -6.93536 | 0.19173  | -0.0144  |
| C | -5.59098 | -0.18212 | 0.02307  |
| C | -4.58099 | 0.78343  | 0.16445  |
| C | -4.93859 | 2.1475   | 0.27065  |
| C | -3.22377 | 0.42447  | 0.2027   |
| C | -2.23227 | 1.39669  | 0.34492  |
| C | -2.58431 | 2.73905  | 0.45116  |
| C | -3.92871 | 3.11286  | 0.41411  |
| H | -6.59013 | 3.55063  | 0.3093   |
| H | -8.33352 | 1.82676  | 0.05848  |
| H | -7.70649 | -0.5662  | -0.12404 |
| H | -5.33562 | -1.2361  | -0.05892 |
| H | -2.92921 | -0.61929 | 0.12137  |
| H | -1.18585 | 1.10453  | 0.37275  |
| H | -1.81329 | 3.4968   | 0.5628   |
| H | -4.1842  | 4.16663  | 0.49844  |

### Cartesian Coordinates:

PHE (phenanthrene).

|   |          |          |    |
|---|----------|----------|----|
| C | -5.0144  | 4.27682  | 0. |
| C | -3.62266 | 4.2513   | 0. |
| C | -2.92819 | 3.03899  | 0. |
| C | -3.64271 | 1.81315  | 0. |
| C | -5.08376 | 1.83958  | 0. |
| C | -5.75285 | 3.0908   | 0. |
| C | -7.15703 | 3.15141  | 0. |
| C | -7.92684 | 1.99148  | 0. |
| C | -7.29956 | 0.7553   | 0. |
| C | -5.90317 | 0.68199  | 0. |
| C | -1.52273 | 3.04807  | 0. |
| C | -0.79598 | 1.86068  | 0. |
| C | -1.46817 | 0.64835  | 0. |
| C | -2.8663  | 0.62629  | 0. |
| H | -5.51739 | 5.24154  | 0. |
| H | -3.08463 | 5.19692  | 0. |
| H | -7.66613 | 4.11316  | 0. |
| H | -9.01136 | 2.05585  | 0. |
| H | -7.89059 | -0.15677 | 0. |
| H | -5.46281 | -0.31084 | 0. |
| H | -0.9787  | 3.99051  | 0. |
| H | 0.29017  | 1.88525  | 0. |
| H | -0.91098 | -0.28478 | 0. |
| H | -3.34278 | -0.34972 | 0. |

### Cartesian Coordinates:

PYR (pyrene).

|   |          |          |    |
|---|----------|----------|----|
| C | -0.73313 | 3.88562  | 0. |
| C | -1.80729 | 2.99194  | 0. |
| C | -1.58808 | 1.60773  | 0. |
| C | -0.26125 | 1.11829  | 0. |
| C | 0.82805  | 2.02458  | 0. |
| C | 0.58811  | 3.4183   | 0. |
| C | 1.67695  | 4.3026   | 0. |
| C | 2.98493  | 3.81907  | 0. |
| C | 3.22248  | 2.44496  | 0. |
| C | 2.15488  | 1.53513  | 0. |
| C | -0.02131 | -0.27543 | 0. |
| C | 1.29993  | -0.74276 | 0. |
| C | 2.37409  | 0.15093  | 0. |
| C | -2.65568 | 0.6979   | 0. |
| C | -2.41813 | -0.6762  | 0. |
| C | -1.11015 | -1.15973 | 0. |
| H | -0.93913 | 4.95365  | 0. |
| H | -2.82002 | 3.38877  | 0. |
| H | 1.51318  | 5.37786  | 0. |
| H | 3.82046  | 4.51423  | 0. |
| H | 4.25002  | 2.08834  | 0. |
| H | 1.50593  | -1.81078 | 0. |
| H | 3.38683  | -0.2459  | 0. |
| H | -3.68322 | 1.05453  | 0. |
| H | -3.25366 | -1.37136 | 0. |
| H | -0.94638 | -2.23499 | 0. |

**Table S1** – Experimental mean concentration (in ng m<sup>-3</sup>) of individual PAHs over Azpeitia, Urretxu, and Bilbao. [1,2]

| PAHs         | Azpeitia | Urretxu | Bilbao |
|--------------|----------|---------|--------|
| <i>BaA</i>   | 0.05     | 0.05    | 0.22   |
| <i>BaP</i>   | 0.05     | 0.05    | 0.22   |
| <i>BbF</i>   | 0.14     | 0.13    | 0.69   |
| <i>BkF</i>   | 0.05     | 0.05    | 0.23   |
| <i>BghiP</i> | 0.19     | 0.12    | 0.27   |
| <i>CHR</i>   | 0.05     | 0.05    | 0.30   |
| <i>FLUO</i>  | 0.05     | 0.05    | 0.34   |
| <i>IdP</i>   | 0.05     | 0.05    | 0.24   |
| <i>NAP</i>   | 0.05     | 0.05    | n.d.   |
| <i>PHE</i>   | 0.11     | 0.05    | 0.22   |
| <i>PYR</i>   | 0.05     | 0.05    | 0.35   |
| <i>DahA</i>  | n.d.     | n.d.    | 0.10   |
| <i>ANTH</i>  | n.d.     | n.d.    | 0.06   |
| <i>FLU</i>   | n.d.     | n.d.    | 0.09   |

**Table S2** – Relative contribution (in %) of individual PAHs to the absorption intensity at ~380 nm, over Azpeitia, Urretxu, and Bilbao using BP86/6-31+G(d,p). Only the most relevant contributions are presented.

| PAHs        | Azpeitia | Urretxu | Bilbao |
|-------------|----------|---------|--------|
| <i>BbF</i>  | 59       | 58      | 51     |
| <i>FLUO</i> | 16       | 17      | 21     |
| <i>IdP</i>  | 11       | 10      | 7      |
| <i>PYR</i>  | 7        | 8       | 14     |

**Table S3** – Relative contribution (in %) of individual PAHs to the absorption intensity at ~425 nm, over Azpeitia, Urretxu, and Bilbao using BP86/6-31+G(d,p). Only the most relevant contributions are presented.

| PAHs         | Azpeitia | Urretxu | Bilbao |
|--------------|----------|---------|--------|
| <i>BaP</i>   | 16       | 21      | 23     |
| <i>BkF</i>   | 12       | 15      | 17     |
| <i>BghiP</i> | 60       | 49      | 30     |
| <i>IdP</i>   | 8        | 10      | 16     |

**Table S4** – Relative contribution (in %) of individual PAHs to the absorption intensity at ~345 nm, over Azpeitia, Urretxu, and Bilbao using PBE0/6-31G(d,p). Only the most relevant contributions are presented.

| PAHs        | Azpeitia | Urretxu | Bilbao |
|-------------|----------|---------|--------|
| <i>BbF</i>  | 41       | 39      | 31     |
| <i>PYR</i>  | 26       | 27      | 32     |
| <i>CHRY</i> | 16       | 16      | 15     |
| <i>FLUO</i> | 13       | 14      | 17     |

**Table S5** – Relative contribution (in %) of individual PAHs to the absorption intensity at ~400 nm, over Azpeitia, Urretxu, and Bilbao using PBE0/6-31G(d,p). Only the most relevant contributions are presented.

| PAHs         | Azpeitia | Urretxu | Bilbao |
|--------------|----------|---------|--------|
| <i>BghiP</i> | 50       | 40      | 22     |
| <i>BbF</i>   | 23       | 27      | 37     |
| <i>BkF</i>   | 12       | 15      | 19     |
| <i>BaP</i>   | 9        | 11      | 11     |

**Table S6** – Relative contribution (in %) of individual PAHs to the absorption intensity at ~360 nm, over Azpeitia, Urretxu, and Bilbao using B3LYP/6-31+G(d,p). Only the most relevant contributions are presented.

| PAHs        | Azpeitia | Urretxu | Bilbao |
|-------------|----------|---------|--------|
| <i>BbF</i>  | 49       | 47      | 42     |
| <i>PYR</i>  | 23       | 24      | 28     |
| <i>FLUO</i> | 13       | 13      | 15     |
| <i>CHRY</i> | 10       | 10      | 10     |

**Table S7** – Relative contribution (in %) of individual PAHs to the absorption intensity at ~410 nm, over Azpeitia, Urretxu, and Bilbao using B3LYP/6-31+G(d,p). Only the most relevant contributions are presented.

| PAHs         | Azpeitia | Urretxu | Bilbao |
|--------------|----------|---------|--------|
| <i>BghiP</i> | 64       | 53      | 34     |
| <i>BkF</i>   | 15       | 20      | 27     |
| <i>BaP</i>   | 15       | 19      | 23     |
| <i>BaA</i>   | 4        | 6       | 7      |

**Table S8** – Relative contribution (in %) of individual PAHs to the absorption intensity at ~325 nm, over Azpeitia, Urretxu, and Bilbao using wB97XD/6-31+G(d,p). Only the most relevant contributions are presented.

| PAHs        | Azpeitia | Urretxu | Bilbao |
|-------------|----------|---------|--------|
| <i>BbF</i>  | 53       | 51      | 44     |
| <i>PYR</i>  | 18       | 19      | 23     |
| <i>FLUO</i> | 14       | 14      | 16     |
| <i>CHRY</i> | 8        | 8       | 8      |

**Table S9** – Relative contribution (in %) of individual PAHs to the absorption intensity at ~365 nm, over Azpeitia and Urretxu, and ~382 nm over Bilbao using wB97XD/6-31+G(d,p). Only the most relevant contributions are presented.

| PAHs         | Azpeitia | Urretxu | Bilbao |
|--------------|----------|---------|--------|
| <i>BghiP</i> | 75       | 65      | 21     |
| <i>BaP</i>   | 9        | 11      | 53     |
| <i>BkF</i>   | 8        | 12      | 1      |
| <i>BaA</i>   | 6        | 8       | 2      |
| <i>IdP</i>   | 3        | 4       | 19     |

**Table S10** – Scope of the selected datasets.

| Reference                                 | Oleagoitia et al. [2]                                                                | Elorduy et al. [1]                                                                                |
|-------------------------------------------|--------------------------------------------------------------------------------------|---------------------------------------------------------------------------------------------------|
| <i>PM fraction</i>                        | PM2.5 (Fine fraction)                                                                | PM10 (Coarse fraction)                                                                            |
| <i>Available data<br/>(PAHs above DL)</i> | BaA, BaP, BbF, BghiP,<br>BkF, CHRY, FLUO, IcdP,<br>NAP, PHEN, PYR<br>(Median values) | ANTH, BaA, BaP, BbF,<br>BghiP, BkF, CHRY, DahA,<br>FLUO, FLU, IcdP, PHEN,<br>PYR<br>(Mean values) |
| <i>Selected<br/>techniques</i>            | UHPLC + Fluorescence<br>Detector                                                     | TD-GC/MS                                                                                          |
| <i>Sampling Sites</i>                     | Azpeitia (Azp)<br>Urretxu (Urr)                                                      | Bilbao (Bil)                                                                                      |
| <i>Type of Sampling<br/>Sites</i>         | Urban industrial                                                                     | Urban                                                                                             |
| <i>Sampling Period</i>                    | Oct. 2011 – Oct. 2012                                                                | Jul. 2013,<br>Sep. 2013 – Dec. 2013                                                               |

**Table S11** – Summary of the experimental datasets in which this study was based. Results are presented in ng/m<sup>3</sup>.

|              | <i>Urretxu</i> [2] | <i>Azpeitia</i> [2] | <i>Bilbao</i> [1] |
|--------------|--------------------|---------------------|-------------------|
| <i>ANTH</i>  | -                  | -                   | 0.06              |
| <i>BaA</i>   | 0.05               | 0.05                | 0.22              |
| <i>BaP</i>   | 0.05               | 0.05                | 0.22              |
| <i>BbF</i>   | 0.13               | 0.14                | 0.69              |
| <i>BkF</i>   | 0.05               | 0.05                | 0.23              |
| <i>BghiP</i> | 0.12               | 0.19                | 0.27              |
| <i>CHRY</i>  | 0.05               | 0.05                | 0.3               |
| <i>DahA</i>  | -                  | -                   | 0.1               |
| <i>FLU</i>   | -                  | -                   | 0.09              |
| <i>FLUO</i>  | 0.05               | 0.05                | 0.34              |
| <i>IcdP</i>  | 0.05               | 0.05                | 0.24              |
| <i>NAP</i>   | 0.05               | 0.05                | -                 |
| <i>PHEN</i>  | 0.05               | 0.11                | 0.22              |
| <i>PYR</i>   | 0.05               | 0.05                | 0.35              |



## References

- [1] I. Elorduy, S. Elcoroaristizabal, N. Durana, J.A. Garcia, L. Alonso, Diurnal variation of particle-bound PAHs in an urban area of Spain using TD-GC/MS: Influence of meteorological parameters and emission sources, *Atmospheric Environment* 138 (2016) 87-98.
- [2] M.B.Z. Oleagoitia, A.L. Manterola, J.I. Maurolagoitia, M.D.M.L. de Dicastillo, J. Alvarez, M.A. Barandiaran, A.I. Loibide, L. Santa-Marina, Polycyclic aromatic hydrocarbons (PAHs) in air associated with particles PM<sub>2.5</sub> in the Basque Country (Spain), *Air Quality Atmosphere and Health* 12(1) (2019) 107-114.
